# Supplementary material for: Improvement of Toluene-Sensing Performance of SnO2 Nanofibers by Pt Functionalization
Source: PubMed Central journal article supplement (PMC5134516; doi:10.3390/s16111857), 2016-11-04
Supplement: sensors-16-01857-s001.pdf [file sensors-16-01857-s001.pdf]

# Supplementary Materials: Improvement of Toluene-Sensing Performance of SnO<sub>2</sub> Nanofibers by Pt Functionalization

Jae-Hun Kim, Zain Ul Abideen, Yifang Zheng and Sang Sub Kim

**Table S1.** Various approaches for functionalization of tin oxide nanostructures and their responses.

| SnO <sub>2</sub> Morphology                               | Synthesis Method                 | Type of Gas                                               | Temperature (°C) | Response | Reference    |
|-----------------------------------------------------------|----------------------------------|-----------------------------------------------------------|------------------|----------|--------------|
| Cu-doped SnO <sub>2</sub> spheres                         | Hydrothermal                     | H <sub>2</sub> S (300 ppm)                                | 300              | 40       | [21]         |
| Pt/SnO <sub>2</sub> catalysts                             | Wet impregnation                 | CO                                                        | 150              | >50      | [22]         |
| Pd/SnO <sub>2</sub> nanostructures                        | Microwave assisted hydrothermal  | CO (200 ppm)                                              | 200              | 7        | [23]         |
| Pd-SnO <sub>2</sub> nanowires                             | Sol-gel method                   | CO (2000 ppm)                                             | 275              | 7        | [24]         |
| CuO/SnO <sub>2</sub> composite                            | Catalytic oxidation              | C <sub>6</sub> H <sub>6</sub> (50 ppm)                    | 280              | 6.3      | [25]         |
| V <sub>2</sub> O <sub>5</sub> /SnO <sub>2</sub> composite | Non-aqueous synthesis            | C <sub>6</sub> H <sub>6</sub> (50 ppm)                    | 270              | <5.5     | [26]         |
| TiO <sub>2</sub> /SnO <sub>2</sub> nanosheets             | Hydrothermal process             | (C <sub>2</sub> H <sub>5</sub> ) <sub>3</sub> N (100 ppm) | 260              | 52.3     | [27]         |
| Pt-SnO <sub>2</sub> hierarchical nanocomposites           | Dipping and precipitation method | C <sub>2</sub> H <sub>5</sub> OH (100 ppm)                | 100              | 11.2     | [28]         |
| Pt NPs-functionalized SnO <sub>2</sub> nanofibers         | Electrospinning and sputtering   | C <sub>7</sub> H <sub>8</sub> (10 ppm)                    | 300              | 11.9     | Present work |

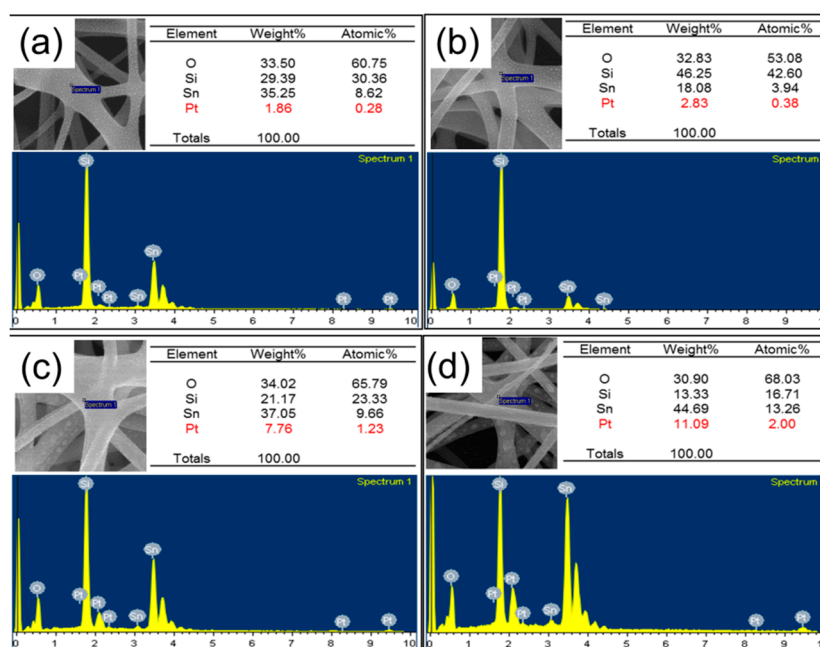

**Figure S1.** Cont.

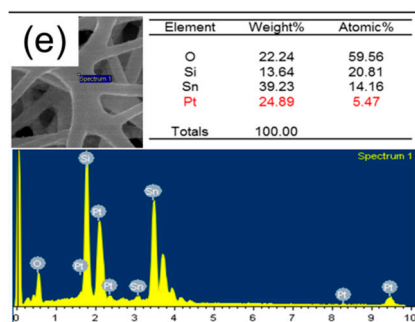

**Figure S1.** Elemental analysis by EDS of SnO<sub>2</sub> NFs functionalized with Pt NPs containing (a) 0.2 at.%; (b) 0.3 at.%; (c) 1.2 at.%; (d) 2.0 at.%; and (e) 5.4 at.% Pt.

| 0.2 at.% (a) |                |         | 0.3 at.% (b) |                |         | 1.2 at.% (c) |                |         |
|--------------|----------------|---------|--------------|----------------|---------|--------------|----------------|---------|
| Element      | Weight%        | Atomic% | Element      | Weight%        | Atomic% | Element      | Weight%        | Atomic% |
| O K          | 33.50 +/- 0.13 | 60.75   | O K          | 32.83 +/- 0.13 | 53.08   | O K          | 34.02 +/- 0.11 | 65.79   |
| Si K         | 29.39 +/- 0.33 | 30.36   | Si K         | 46.25 +/- 0.28 | 42.60   | Si K         | 21.17 +/- 0.09 | 23.33   |
| Sn L         | 35.25 +/- 0.32 | 8.62    | Sn L         | 18.08 +/- 0.32 | 3.94    | Sn L         | 37.05 +/- 0.26 | 9.66    |
| Pt M         | 1.86 +/- 0.19  | 0.28    | Pt M         | 2.83 +/- 0.20  | 0.38    | Pt M         | 7.76 +/- 0.23  | 1.23    |
| Totals       | 100.00         |         | Totals       | 100.00         |         | Totals       | 100.00         |         |

  

| 2.0 at.% (d) |                |         | 5.4 at.% (e) |                |         |
|--------------|----------------|---------|--------------|----------------|---------|
| Element      | Weight%        | Atomic% | Element      | Weight%        | Atomic% |
| O K          | 30.90 +/- 0.13 | 68.03   | O K          | 22.24 +/- 0.12 | 59.56   |
| Si K         | 13.33 +/- 0.33 | 16.71   | Si K         | 13.64 +/- 0.21 | 20.81   |
| Sn L         | 44.69 +/- 0.37 | 13.26   | Sn L         | 39.23 +/- 0.40 | 14.16   |
| Pt M         | 11.09 +/- 0.30 | 2.00    | Pt M         | 24.89 +/- 0.38 | 5.47    |
| Totals       | 100.00         |         | Totals       | 100.00         |         |

$$at.\% = \left( \frac{wt.\%}{atomic\ weight} \right) \times 100$$

**Figure S2.** Elemental analysis including errors in quantitative calculation by EDS of SnO<sub>2</sub> NFs functionalized with Pt NPs containing (a) 0.2 at.%; (b) 0.3 at.%; (c) 1.2 at.%; (d) 2.0 at.%; and (e) 5.4 at.% Pt.
